# Supplementary material
Source: PubMed Central journal article supplement (PMC2034308)
Supplement: NIHMS31350-supplement-01.pdf [file NIHMS31350-supplement-01.pdf]

| Strain <sup>a</sup> | Genotype <sup>b</sup>                                                                              | Source     |
|---------------------|----------------------------------------------------------------------------------------------------|------------|
| RSY335*             | <i>MATa/MATα</i>                                                                                   | This study |
| RSY1079*            | <i>MATa/MATα T7-UME6</i>                                                                           | This study |
| RSY1080*            | <i>MATa/MATα T7-UME6<sup>db1Δ</sup></i>                                                            | This study |
| RSY1182*            | <i>MATa/MATα rim15::KANMX</i>                                                                      | This study |
| RSY1100*            | <i>MATa/MATα rim11::TRP1</i>                                                                       | This study |
| RSY1183*            | <i>MATa/MATα rim11::TRP1 rim15::KANMX</i>                                                          | This study |
| RSY809*             | <i>MATa/MATα cdc20-1</i>                                                                           | This study |
| RSY1101             | <i>MATa/MATα cdc20-1 T7-UME6</i>                                                                   |            |
| RSY1069*            | <i>MATα T7-UME6</i>                                                                                | This study |
| RSY1070             | <i>MATα T7-UME6<sup>db1Δ</sup></i>                                                                 | This study |
| RSY303              | <i>MATa/MATa ade2 ade6 can1-100 his3-11,15<br/>leu2-3,112 trp1-1 ura3-1</i>                        | This study |
| RSY1062*            | <i>MATa/MATα ume6::LEU2</i>                                                                        | This study |
| 2072                | <i>MAT□ cdc25-5 leu2-3,112 ura3-52</i>                                                             | J. Broach  |
| H20c1a5             | <i>MATα can1 cdc20-1 gal1 his7 hom3 sap3</i>                                                       | V. Guacci  |
| RSY1056             | <i>MATa his3Δ200 can1 leu2Δ1 lys2-801<br/>pep4::HIS3 pbr1-Δ1.6R trp1-289 ura3-52<br/>CDC16-TAP</i> | This study |
| RSY1395             | <i>MATa/MATα UME6<sup>T99N</sup></i>                                                               | This study |

Table S1. Yeast strains used in this study. <sup>a</sup>Asterisk denotes strains also harboring *cyh2<sup>r</sup>-z ho::LYS2 leu2::hisG lys2 trp1::hisG ura3* alleles. <sup>b</sup>All alleles listed are homozygous unless indicated otherwise.

---

| Name           | sequence                                                            |
|----------------|---------------------------------------------------------------------|
| T7             | ATTGCGGCTGCCTCGATGGCTAGCATGACTGGTGGACAGCAAATGG<br>GTCTGCTTTCGATGGAA |
| Dbox1 $\Delta$ | CACATTA AAACTTCTGCAGCCACGGCTATGAATAGCAGACAA                         |
| Dbox2 $\Delta$ | AAATTGGATGGATTGGCTTCAAGAGCTTTGCTCGGTCCGAAT                          |
| Dbox3 $\Delta$ | TCAAAGGGTGTCTTAGCACCAATTGCTTTACGTATCCATAAT                          |
| Dbox4 $\Delta$ | TGTTTCAACTGTGAAGCTTTGAAAGCGGACTGTCACTATGAC                          |

---

Table S2. Oligonucleotides used for sight directed mutagenesis in this study.

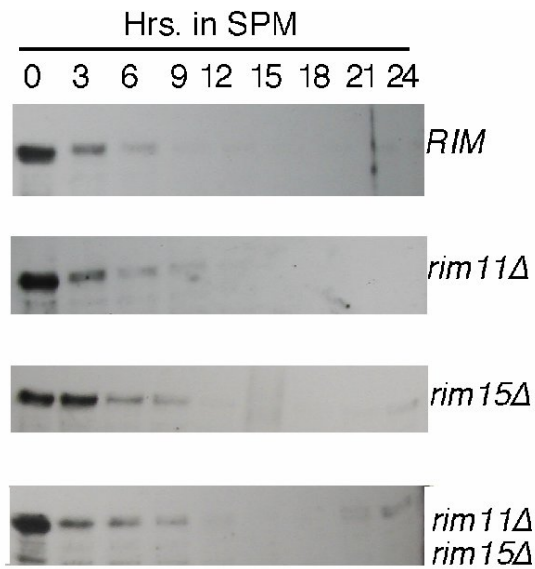

Figure S1. T7-Ume6p levels were monitored in a meiotic timecourse experiment by Western blot analysis in wild type (RSY1079), *rim11Δ* (RSY1100), *rim15Δ* (RSY1182) and *rim11Δ rim15Δ* double mutant (RSY1183) strains as described in Experimental procedures.
